# Supplementary figures and images for: CD19 is a major B cell receptor–independent activator of MYC-driven B-lymphomagenesis
Source: JCI journal article supplement (doi:10.1172/jci45851), 2012-05-01

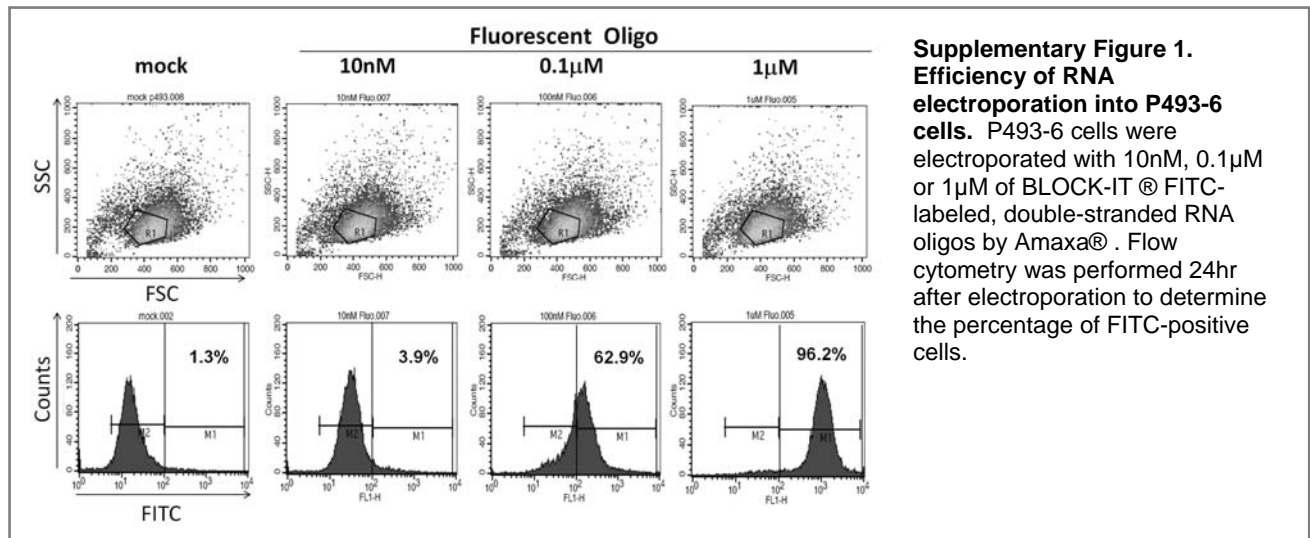

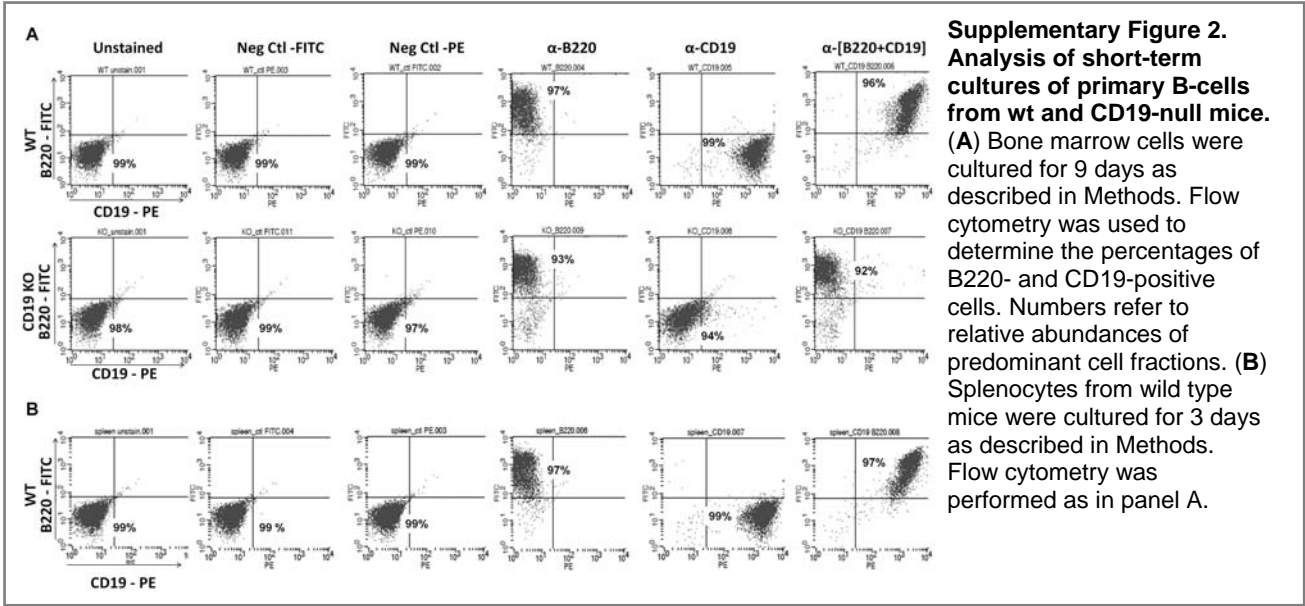

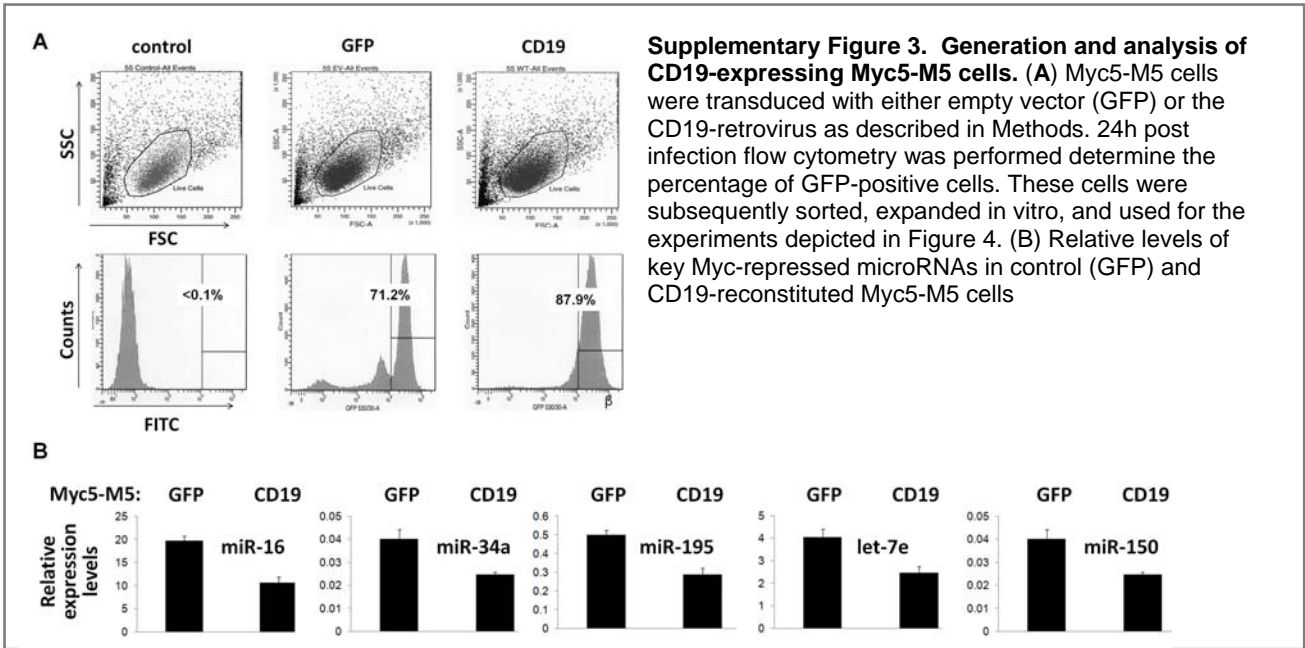

Supplement: sd1 [file 1]
